# Supplementary material
Source: publisher figshare collection journal article supplement (https://brill.figshare.com/ndownloader/files/31257787)
Supplement: Supplementary file 1 [file 31257787]

APPENDIX G

Table G1. Pearson correlation coefficients (*r*) in pairwise comparisons of the quantitative descriptors of the vascular system and the PCA axes selected by Kaiser–Guttman and broken stick model criteria

|  | Descriptor | *Moquiniastrum polymorphum* | | | *Zanthoxylum rhoifolium* | | | |
| --- | --- | --- | --- | --- | --- | --- | --- | --- |
| PC1 (27%)  ƛ = 4.61 | PC2 (20%)  ƛ = 3.44 | PC3 (12%)  ƛ = 2.04 | PC1 (25%)  ƛ = 4.03 | PC2 (21%)  ƛ = 3.32 | PC3 (14%)  ƛ = 2.31 | PC4 (10%)  ƛ = 1.62 |
| Secondary xylem | Vessel diameter | –0.62 | –0.36 | 0.20 | –0.71* | 0.56 | –0.11 | 0.02 |
| Vessel density | 0.81* | 0.12 | –0.07 | 0.41 | –0.29 | –0.19 | –0.58 |
| Vessel element length | –0.02 | 0.85* | 0.12 | 0.71* | 0.60 | –0.17 | 0.23 |
| Vessel grouping index | –0.10 | 0.48 | 0.43 | –0.33 | 0.16 | –0.35 | –0.24 |
| Fiber-wall thickness | –0.86* | –0.18 | 0.23 | 0.00 | –0.29 | –0.50 | 0.37 |
| Fiber length | –0.33 | –0.01 | 0.38 | 0.14 | 0.65 | –0.32 | 0.57 |
| Rays per millimeter | –0.11 | 0.37 | –0.56 | –0.54 | 0.72* | 0.20 | –0.15 |
| Ray height | –0.81* | 0.03 | –0.34 | 0.58 | 0.37 | –0.38 | –0.39 |
| Ray width | –0.62 | –0.61 | –0.23 | 0.02 | –0.67 | –0.59 | 0.09 |
| Intervessel pit diameter | –0.56 | 0.25 | –0.58 | – | – | – | – |
| Vessel-ray pit aperture | –0.62 | 0.54 | –0.24 | –0.75* | –0.17 | 0.03 | 0.39 |
| Fraction of parenchyma | 0.04 | –0.65 | 0.20 | –0.34 | –0.15 | –0.49 | –0.46 |
|  |  |  |  |  |  |  |  |  |
| Secondary phloem | Sieve-tube diameter | –0.22 | 0.49 | 0.20 | –0.53 | 0.31 | –0.69 | 0.03 |
| Sieve-tube element length | –0.05 | 0.74* | 0.40 | 0.50 | 0.57 | –0.45 | –0.04 |
| Fiber-wall thickness | – | – | – | –0.70* | 0.00 | –0.37 | –0.16 |
| Rays per millimeter | 0.16 | –0.37 | 0.49 | – | – | – | – |
| Ray height | –0.79* | –0.14 | 0.24 | 0.56 | 0.24 | –0.06 | 0.04 |
| Fraction of cells with primary walls | 0.52 | –0.28 | –0.42 | –0.31 | 0.63 | 0.39 | –0.36 |

The percentage of variance explained by each PCA axis is shown in parentheses.

* Significantly different correlation coefficients (*p* < 0.05).
